# Supplementary material
Source: PubMed Central journal article supplement (PMC10339225)
Supplement: jamasurg-e232414-s001.pdf [file jamasurg-e232414-s001.pdf]

## Supplemental Online Content

Rochlin DH, Barrio AV, McLaughlin S, et al. Feasibility and clinical utility of prediction models for breast cancer–related lymphedema incorporating racial differences in disease incidence. *JAMA Surg*. Published online July 12, 2023.  
doi:10.1001/jamasurg.2023.2414

**eTable 1.** Univariable and Multivariable Logistic Regression Modeling Lymphedema Development

**eFigure 1.** Margins Plots for Model 1 by Variable

**eFigure 2.** Margins Plots for Model 2 by Variable

**eTable 2.** Sensitivity Analysis: Bayesian Logistic Regression

**eTable 3.** Patient Demographic and Clinical Data for MSKCC ICD Validation Cohort

**eFigure 3.** Ten-Fold ROC Curves for Model 2 Internal Validation

**eTable 4.** Literature Review of Predictive Models for Breast Cancer-Related Lymphedema (BCRL)

This supplementary material has been provided by the authors to give readers additional information about their work.

**eTable 1.** Univariable and Multivariable Logistic Regression Modeling Lymphedema Development

| Variable                               | Univariable analysis |               |         | Multivariable analysis |              |         |
|----------------------------------------|----------------------|---------------|---------|------------------------|--------------|---------|
|                                        | OR                   | 95% CI        | p-value | OR                     | 95% CI       | p-value |
| Baseline age [per 1-year]              | 0.99                 | 0.98 – 1.00   | 0.094   | 0.91                   | 0.65 – 1.26  | 0.553   |
| Follow-up age [per 1-year]             | 0.99                 | 0.98 – 1.00   | 0.072   | 1.12                   | 0.80 – 1.55  | 0.507   |
| Baseline weight [per 1-kg increase]    | 1.01                 | 1.01 – 1.02   | <0.001  | 0.78                   | 0.52 – 1.17  | 0.234   |
| Follow up weight [per 1-kg increase]   | 1.01                 | 1.01 – 1.02   | <0.001  | 1.30                   | 0.86 – 1.95  | 0.213   |
| Weight change [per 1-kg increase]      | 1.00                 | 0.98 – 1.02   | 0.749   | 0.78                   | 0.52 – 1.17  | 0.227   |
| Height [per cm]                        | 1.00                 | 0.98 – 1.02   | 0.797   | 0.98                   | 0.96 – 1.00  | 0.110   |
| Follow up years [per year]             | 0.95                 | 0.88 – 1.03   | 0.249   | 1.07                   | 0.77 – 1.50  | 0.675   |
| Race [ref: white]                      |                      |               |         |                        |              |         |
| Other                                  | 1.54                 | 0.71 – 3.23   | 0.270   | 1.23                   | 0.51 – 2.94  | 0.644   |
| Black                                  | 2.51                 | 1.72 – 3.68   | <0.001  | 1.85                   | 1.20 – 2.86  | 0.005   |
| Asian                                  | 1.27                 | 0.64 – 2.50   | 0.499   | 1.08                   | 0.51 – 2.30  | 0.836   |
| Mastectomy/BCT [ref: BCT]              | 1.97                 | 1.48 – 2.62   | <0.001  | 1.23                   | 0.82 – 1.85  | 0.311   |
| Tumor size [per cm]                    | 1.20                 | 1.12 – 1.28   | <0.001  | 1.02                   | 0.94 – 1.10  | 0.669   |
| No. nodes removed [per LN]             | 1.08                 | 1.07 – 1.09   | <0.001  | 1.02                   | 1.00 – 1.04  | 0.115   |
| No. positive nodes [per 1-LN positive] | 1.09                 | 1.06 – 1.12   | <0.001  | 1.01                   | 0.98 – 1.05  | 0.496   |
| ALND/SLNB [ref: SLNB]                  | 9.47                 | 6.42 – 13.95  | <0.001  | 6.12                   | 3.45 – 10.85 | <0.001  |
| Any radiation therapy [no]             | 1.66                 | 1.15 – 2.40   | 0.007   | 1.38                   | 0.83 – 2.30  | 0.215   |
| Any chemotherapy [no]                  | 4.50                 | 2.95 – 6.86   | <0.001  | 1.62                   | 0.98 – 2.66  | 0.058   |
| Neoadjuvant chemotherapy [no]          | 3.11                 | 2.31 – 4.19   | <0.001  | 1.21                   | 0.79 – 1.86  | 0.379   |
| Do you have swelling now? [ref: no]    |                      |               |         |                        |              |         |
| Yes                                    | 18.89                | 13.54 – 26.35 | <0.001  | -                      | -            | -       |
| Unknown                                | 1.39                 | 0.59 – 3.30   | 0.452   | -                      | -            | -       |
| Have you had infections? [ref: no]     |                      |               |         |                        |              |         |
| Yes                                    | 2.47                 | 1.40 – 4.35   | 0.002   | -                      | -            | -       |
| Unknown                                | 0.37                 | 0.15 – 0.93   | 0.034   | -                      | -            | -       |

Patient-reported outcomes excluded from multivariable analysis. ALND, axillary lymph node dissection. BCT, breast conserving therapy. CI, confidence interval. LN, lymph node. OR, odds ratio. Ref, reference. SLNB, sentinel lymph node biopsy.

**eFigure 1. Margins Plots for Model 1 by Variable**

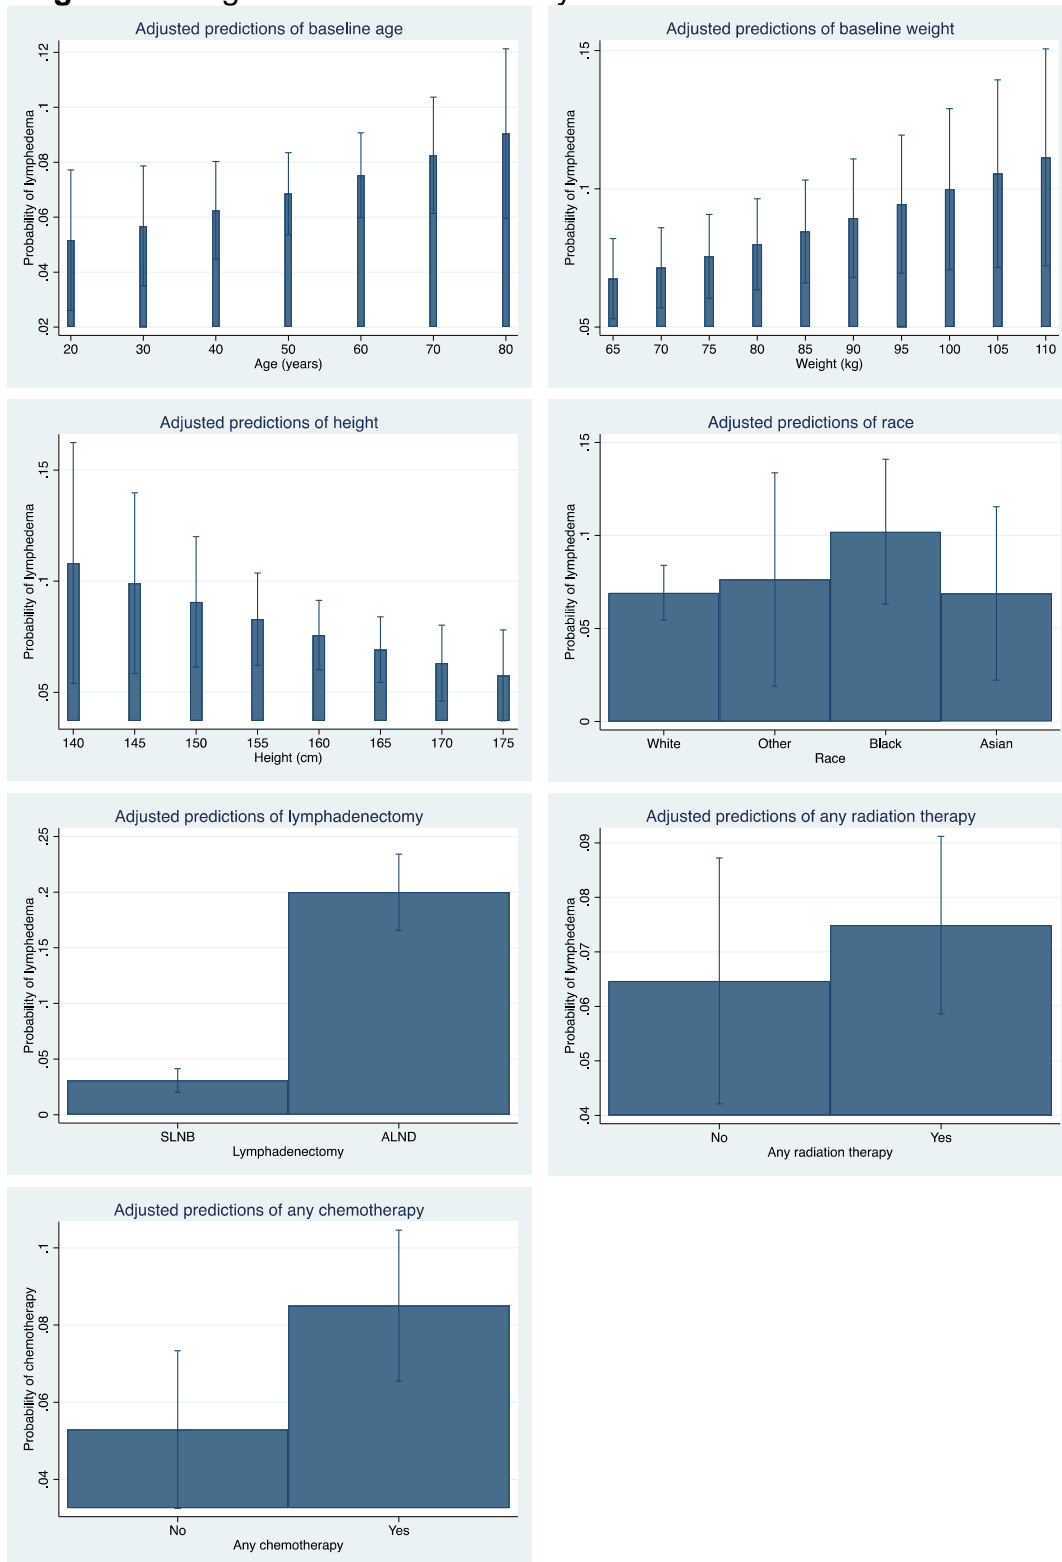

Adjusted predicted margins are computed at sample means. Each column represents the probability that a patient with a given characteristic has lymphedema with the rest of the predictors in the model set at their mean values. For instance, the probability of BCRL in a patient who underwent ALND is 20.0% compared to 3.1% for SLNB, when all other predictors are at their average value. Bars represent 95% confidence intervals.

**eFigure 2. Margins Plots for Model 2 by Variable**

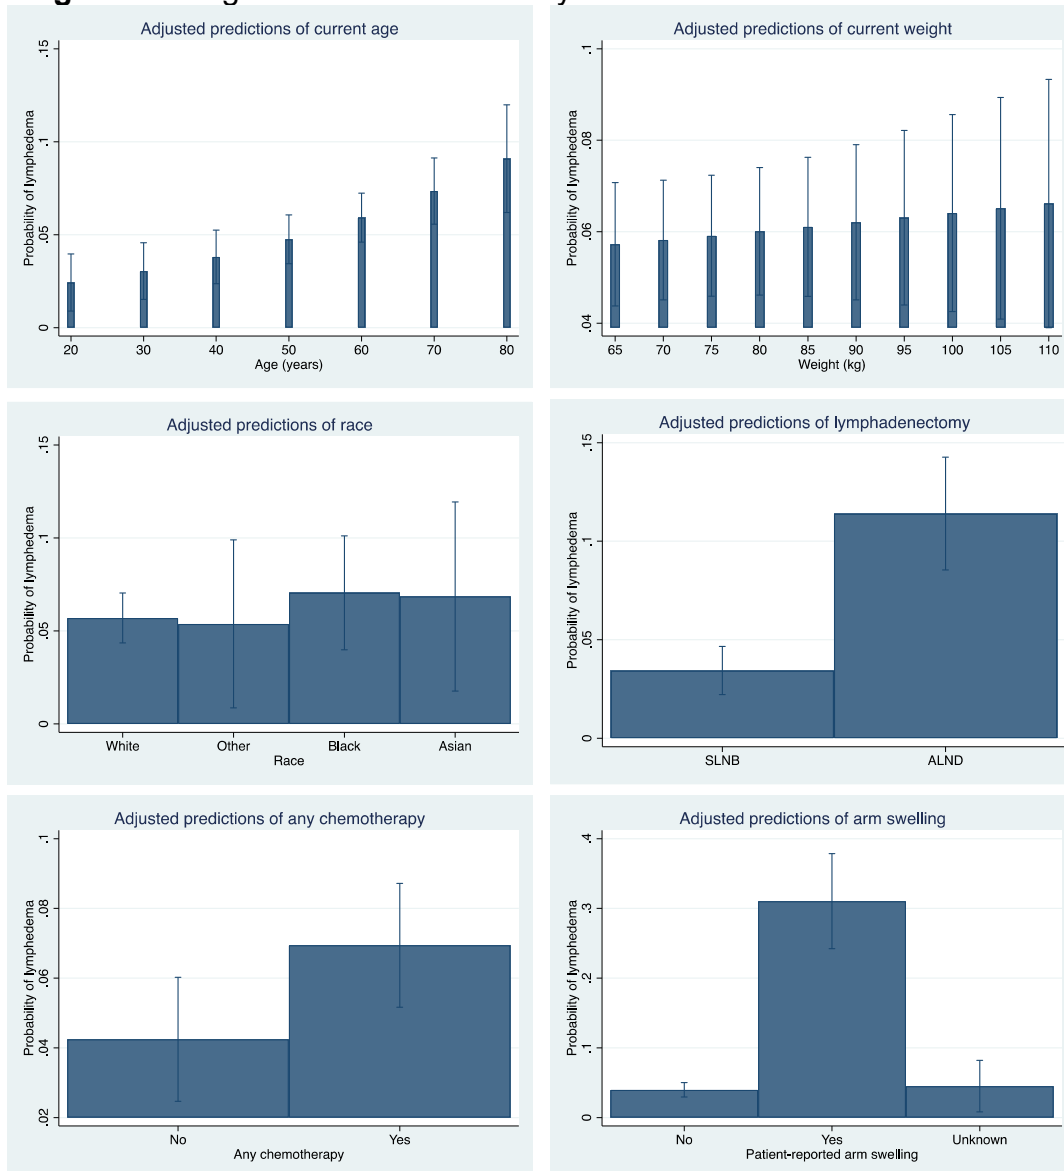

Adjusted predicted margins are computed at sample means. Each column represents the probability that a patient with a given characteristic has lymphedema with the rest of the predictors in the model set at their mean values. For instance, the probability of BCRL in a patient who underwent ALND is 11.4% compared to 3.4% for SLNB, when all other predictors are at their average value. Bars represent 95% confidence intervals.

**eTable 2.** Sensitivity Analysis: Bayesian Logistic Regression

| Variable                                    | OR    | 95% Credible Interval | MCSE    |
|---------------------------------------------|-------|-----------------------|---------|
| <b><i>Preoperative Model (model 1)</i></b>  |       |                       |         |
| Baseline age [per 1-year increase]          | 1.01  | 1.00 – 1.02           | 0.0034  |
| Baseline weight [per 1-kg increase]         | 1.01  | 1.00 – 1.02           | 0.0003  |
| Height [per 1-cm increase]                  | 0.98  | 0.97 – 0.99           | 0.0006  |
| Race                                        |       |                       |         |
| White [ref]                                 | -     | -                     | -       |
| Other                                       | 1.08  | 0.45 – 2.04           | 0.0305  |
| Black                                       | 1.57  | 1.10 – 2.18           | 0.0341  |
| Asian                                       | 0.99  | 0.47 – 1.73           | 0.0668  |
| Lymphadenectomy                             |       |                       |         |
| SLNB [ref]                                  | -     | -                     | -       |
| ALND                                        | 8.26  | 5.45 – 12.62          | 0.2067  |
| Any radiation therapy                       |       |                       |         |
| No [ref]                                    | -     | -                     | -       |
| Yes                                         | 1.20  | 0.78 – 1.78           | 0.0126  |
| Any chemotherapy                            |       |                       |         |
| No [ref]                                    | -     | -                     | -       |
| Yes                                         | 1.64  | 1.16 – 2.24           | 0.0387  |
| <b><i>Postoperative Model (model 2)</i></b> |       |                       |         |
| Current age [per 1-year increase]           | 1.03  | 1.01 – 1.04           | 0.0011  |
| Current weight [per 1-kg increase]          | 1.00  | 0.99 – 1.01           | 0.0003  |
| Race                                        |       |                       |         |
| White [ref]                                 | -     | -                     | -       |
| Other                                       | 1.34  | 0.64 – 2.44           | 0.0477  |
| Black                                       | 1.39  | 0.88 – 2.04           | 0.0239  |
| Asian                                       | 1.46  | 0.61 – 2.58           | 0.0953  |
| Lymphadenectomy                             |       |                       |         |
| SLNB [ref]                                  | -     | -                     | -       |
| ALND                                        | 4.20  | 2.95 – 5.99           | 0.01587 |
| Any chemotherapy                            |       |                       |         |
| No [ref]                                    | -     | -                     | -       |
| Yes                                         | 1.39  | 0.93 – 2.00           | 0.0574  |
| Do you have swelling now?                   |       |                       |         |
| No [ref]                                    | -     | -                     | -       |
| Yes                                         | 11.95 | 9.07 – 15.85          | 11.813  |
| Unknown                                     | 1.07  | 0.55 – 2.20           | 0.9786  |

ALND, axillary lymph node dissection. MCSE, Monte Carlo standard error. OR, odds ratio. Ref, reference. RT, radiation therapy. SLNB, sentinel lymph node biopsy. Random-walk Metropolis-Hastings sampling. Markov Chain Monte Carlo (MCMC) iterations=12,500, Burn-in=2,500. MCMC sample size=10,000.

**eTable 3.** Patient Demographic and Clinical Data for MSKCC ICD Validation Cohort

| <b>Variable</b>                     | <b>MSKCC ICD<br/>(n=34,438)</b> |
|-------------------------------------|---------------------------------|
| Age at surgery (years)              | 55.2 ± 12.4                     |
| Height (cm)                         | 161.3 ± 6.6                     |
| Weight at surgery (kg)              | 71.4 ± 16.7                     |
| BMI at surgery (kg/m <sup>2</sup> ) | 27.5 ± 6.2                      |
| Follow up (years)                   | 6.2 ± 5.0                       |
| Lymphedema                          |                                 |
| Yes                                 | 2,787 (8.1%)                    |
| No                                  | 31,651 (91.9%)                  |
| Race                                |                                 |
| Asian                               | 2,695 (7.8%)                    |
| Black                               | 3,160 (9.2%)                    |
| White                               | 27,670 (80.4%)                  |
| Other                               | 913 (2.7%)                      |
| Lymphadenectomy                     |                                 |
| ALND                                | 5,927 (17.2%)                   |
| SLNB                                | 28,511 (82.8%)                  |
| Any radiation therapy (yes)         | 16,606 (48.2%)                  |
| Any chemotherapy (yes)              | 13,575 (39.4%)                  |
| Neoadjuvant chemotherapy (yes)      | 2,502 (7.3%)                    |

ALND, axillary lymph node dissection. ICD, International Classification of Diseases. MSKCC, Memorial Sloan Kettering Cancer Center. SLNB, sentinel lymph node biopsy.

**eFigure 3.** Ten-Fold ROC Curves for Model 2 Internal Validation

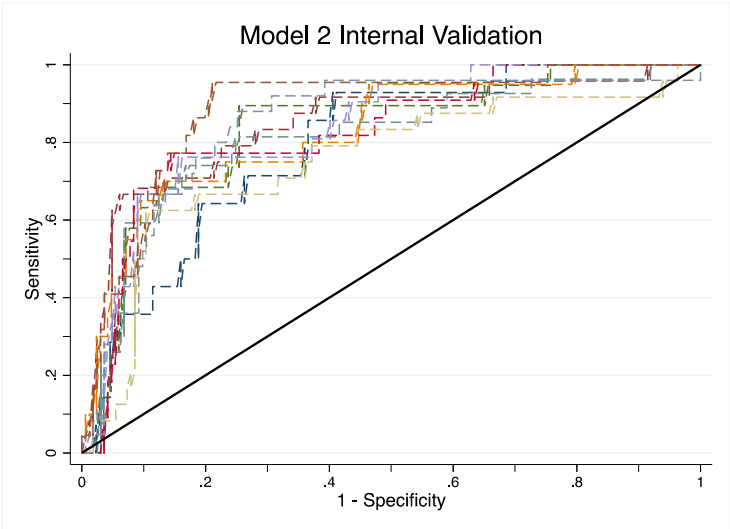

Cross-validated mean AUC (cvAUC)=0.82, bootstrap bias corrected 95% CI=0.79 – 0.85, cross-validated standard deviation (cvSD)=0.04, k=10.

**eTable 4.** Literature Review of Predictive Models for Breast Cancer-Related Lymphedema (BCRL)

| Source                 | Definition of Lymphedema                                                                   | Cohort                                                                                                                                                                                | Predictive Model                                                                                                                                                                                                                                                                                                                                                                                                                                                                                                                                                                                | Nomogram | Accuracy/Validation                                                                                                                              |
|------------------------|--------------------------------------------------------------------------------------------|---------------------------------------------------------------------------------------------------------------------------------------------------------------------------------------|-------------------------------------------------------------------------------------------------------------------------------------------------------------------------------------------------------------------------------------------------------------------------------------------------------------------------------------------------------------------------------------------------------------------------------------------------------------------------------------------------------------------------------------------------------------------------------------------------|----------|--------------------------------------------------------------------------------------------------------------------------------------------------|
| Soran et al. 2011      | N/A                                                                                        | 51 women with lymphedema compared to 126 controls matched based on age, radiation therapy, and type of operation (lumpectomy, mastectomy +/- reconstruction). SLNB/ALND not reported. | Model constructed using Bayes' theorem and published estimates of lymphedema incidence, based on combinations of 3 modifiable risk factors: <ul style="list-style-type: none"> <li>• Upper extremity infection</li> <li>• Level of occupational/hobby hand use</li> <li>• BMI <math>\geq</math>25</li> </ul>                                                                                                                                                                                                                                                                                    | No       | N/A                                                                                                                                              |
| Bevilacqua et al. 2012 | Volume difference of $\geq$ 200 ml between arms at $\geq$ 6 months postoperative           | 1,054 women with breast cancer who underwent lumpectomy or mastectomy and ALND. BCRL cumulative incidence 30.3% over 5 years.                                                         | Model predicts 5-year probability at each time point, derived from hazard ratios (Cox regression). <p><u>Model 1:</u> preoperative</p> <ul style="list-style-type: none"> <li>• Age, BMI, number cycles neoadjuvant chemotherapy in ipsilateral arm</li> </ul> <p><u>Model 2:</u> within 6 months of surgery</p> <ul style="list-style-type: none"> <li>• Model 1 factors + level of axillary dissection, radiotherapy field</li> </ul> <p><u>Model 3:</u> <math>\geq</math>6 months from surgery</p> <ul style="list-style-type: none"> <li>• Model 2 factors + seroma, early edema</li> </ul> | Yes      | C-index=0.71–0.74<br><br>External (Li et. al 2017): AUC=0.71<br>Hosmer-Lemeshow test p=0.0634<br><br>External (Soran et al. 2016): AUC=0.60–0.61 |
| Kim et al. 2013        | Grading system based on patient perception of arm edema, and arm circumference measurement | 772 patients with breast cancer who underwent mastectomy or BCS and ALND. 127 developed BCRL (cumulative incidence 17% over 5 years). Excluded if neoadjuvant chemotherapy.           | Model based on hazard ratios (Cox regression) using combinations of: <ul style="list-style-type: none"> <li>• Number of dissected axillary nodes</li> <li>• Adjuvant chemotherapy</li> <li>• Supraclavicular radiation therapy</li> </ul> <p>Divided into low-, intermediate-, and high-risk groups based on number of risk factors. Each group with lymphedema rate at 5 years.</p>                                                                                                                                                                                                            | No       | N/A                                                                                                                                              |



| Source            | Definition of Lymphedema        | Cohort                                                                                                                                                                                                           | Predictive Model                                                                                                                                                                                                                                                                                                                                                                                                                                                                                                                                                                                                                                                                                                                                                                                                                                                            | Nomogram | Accuracy/Validation                                                                                                 |
|-------------------|---------------------------------|------------------------------------------------------------------------------------------------------------------------------------------------------------------------------------------------------------------|-----------------------------------------------------------------------------------------------------------------------------------------------------------------------------------------------------------------------------------------------------------------------------------------------------------------------------------------------------------------------------------------------------------------------------------------------------------------------------------------------------------------------------------------------------------------------------------------------------------------------------------------------------------------------------------------------------------------------------------------------------------------------------------------------------------------------------------------------------------------------------|----------|---------------------------------------------------------------------------------------------------------------------|
| Wang et al. 2016  | Circumferential arm measurement | 358 women with breast cancer who underwent ALND. 31.8% incidence of lymphedema at 12 months.                                                                                                                     | Scoring system derived from odds ratios (logistic regression). Model factors: <ul style="list-style-type: none"> <li>• Level of ALND</li> <li>• Hypertension</li> <li>• Surgery on dominant arm</li> <li>• Radiotherapy</li> <li>• Surgical infection, seroma, and/or early edema</li> </ul>                                                                                                                                                                                                                                                                                                                                                                                                                                                                                                                                                                                | No       | AUC=0.88                                                                                                            |
| Basta et al. 2017 | ICD-9 code                      | 3,136 women with breast cancer diagnosis and mastectomy in institutional electronic medical records. BCRL in 325 (10.4%) with average follow-up of 4.2 years (range 1.0-14.8). ALND in 39.4%, no report of SLNB. | <p><u>Model 1</u> (based on adjusted hazard ratios, Cox regression): Risk Factor Model</p> <ul style="list-style-type: none"> <li>• Invasive cancer, post-mastectomy radiation, age &gt;65, ALND, WHO Class 2 or 3 obesity, neoadjuvant chemotherapy, bilateral mastectomy; BMI≤25 (protective)</li> </ul> <p><u>Model 2</u> (based on stratification of composite risk scores from Risk Factor Model): Risk Assessment Tool Evaluation Lymphedema, RATE-L</p> <ul style="list-style-type: none"> <li>• 2 point factors: invasive cancer, post-mastectomy radiation, age &gt;65</li> <li>• 1 point factors: axillary dissection, BMI&gt;35, neoadjuvant chemotherapy, bilateral mastectomy</li> <li>• -1 point factor: BMI≤25</li> </ul> <p>Composite score 0-2=low risk, 3-4=moderate risk, 5-6=high risk, 7+=extreme risk, each corresponding to % risk of lymphedema</p> | No       | C-index=0.77–0.78. Plot of martingale hazard residuals against Cox-Snell generalized residuals for goodness-of-fit. |

| Source            | Definition of Lymphedema                                                                                            | Cohort                                                                                                                                                                                                                                                                      | Predictive Model                                                                                                                                                                                                                                                                                                                                                                                                                                                         | Nomogram | Accuracy/Validation                                                                                |
|-------------------|---------------------------------------------------------------------------------------------------------------------|-----------------------------------------------------------------------------------------------------------------------------------------------------------------------------------------------------------------------------------------------------------------------------|--------------------------------------------------------------------------------------------------------------------------------------------------------------------------------------------------------------------------------------------------------------------------------------------------------------------------------------------------------------------------------------------------------------------------------------------------------------------------|----------|----------------------------------------------------------------------------------------------------|
| Gross et al. 2019 | NCI of Canada Common Toxicity Criterion Version 2.0 grade 2 (“moderate lymphedema requiring compression”) or higher | 1,832 women with breast cancer (node-positive or high-risk node negative) who underwent BCS, radiation, adjuvant chemo and/or hormone therapy, and SLNB and/or ALND (3.7% with SLNB alone). Median 8.2 (IQR 5.1-10.1) year follow-up.                                       | Model derived from odds ratios (logistic regression) including factors: <ul style="list-style-type: none"> <li>• BMI</li> <li>• Extent of axillary surgery (number of nodes removed)</li> <li>• Extent of nodal radiation (RNI field group)</li> </ul>                                                                                                                                                                                                                   | Yes      | Internal:<br>C-index=0.69<br>Calibration plot<br><br>External:<br>C-index=0.71<br>Calibration plot |
| Kwan et al. 2020  | Limb volume calculated from circumferential measurements (mild >200ml, severe >500 ml)                              | 373 women who completed breast cancer treatment, with median follow-up of 1.1 (IQR 0.6-2.5) years since cancer diagnosis, divided into training (n=247) and validation (n=126) cohorts. ALND in 54.3% of training cohort and 46.0% of validation cohort, no report of SLNB. | 5-factor model based on linear regression to predict lymphedema risk: <ul style="list-style-type: none"> <li>• Age</li> <li>• BMI</li> <li>• Mammographic breast density</li> <li>• Number of pathologic lymph nodes</li> <li>• ALND</li> </ul> <p>Factors also used to predict volume of lymphedema based on equation:<br/>lymphedema volume = -329 + [4 x Age] + [10 x BMI] – [37 x Mammographic breast density] + [13 x No. pathologic lymph nodes] + [99 x ALND]</p> | No       | AUC=0.72–0.83                                                                                      |
| Liu et al. 2021   | Sequential circumferential arm measurements; difference of ≥ 2cm                                                    | 533 women who underwent surgery for breast cancer including SLNB (19.3%) and/or ALND (80.7%); 355 for model establishment (28.7% with lymphedema) and 178 for validation (30.3% with lymphedema) with unspecified follow-up time.                                           | Additive scoring system (6-22 points) based on odds ratios (logistic regression). Model factors: <ul style="list-style-type: none"> <li>• Medical: surgery type (lumpectomy vs. mastectomy), type of axillary surgery (SLNB vs. ALND), early edema, neoadjuvant chemotherapy, radiotherapy</li> <li>• Behavioral: “use of the affected arm to lift or carry heavy objects suddenly”</li> </ul>                                                                           | No       | AUC=0.74<br>Hosmer-Lemeshow test<br>p=0.274                                                        |

| Source           | Definition of Lymphedema                                                                                                                       | Cohort                                                                                                                                                                 | Predictive Model                                                                                                                                                                                                                                                                                                                       | Nomogram | Accuracy/Validation                                                                                                                                                                                                                                                                                 |
|------------------|------------------------------------------------------------------------------------------------------------------------------------------------|------------------------------------------------------------------------------------------------------------------------------------------------------------------------|----------------------------------------------------------------------------------------------------------------------------------------------------------------------------------------------------------------------------------------------------------------------------------------------------------------------------------------|----------|-----------------------------------------------------------------------------------------------------------------------------------------------------------------------------------------------------------------------------------------------------------------------------------------------------|
| Byun et al. 2021 | Subjective patient report of arm swelling, heaviness, tightness, or numbness, and/or difference in arm circumference $\geq$ 2cm at >1 location | 5,549 women with breast cancer who underwent lumpectomy or mastectomy. 639 developed BCRL at median follow-up of 60.1 months (range 12-140.2). SLNB/ALND not reported. | Model derived from hazard ratios (Cox regression) to predict 2-, 3-, and 5-year probability. Factors in model: <ul style="list-style-type: none"> <li>• BMI</li> <li>• Total vs. partial mastectomy</li> <li>• Taxane-based chemotherapy</li> <li>• Radiation field/fractionation type</li> <li>• Number of dissected nodes</li> </ul> | Yes      | Internal:<br>C-index = 0.77<br>iAUC = 0.75<br>Calibration plots<br><br>External:<br>C-index = 0.82-0.83,<br>iAUC = 0.78-0.80<br>Calibration plots<br><br>External (Byun et al 2022):<br>C-index = 0.79<br>iAUC = 0.76<br>Calibration plots                                                          |
| Wei et al. 2021  | Sequential circumferential measurements; difference of $\geq$ 1cm for early detection or $\geq$ 2cm for late detection                         | 553 breast cancer survivors who had completed surgery including SLNB (19.3%), ALND (44.3%), or both (36.4%), split into training and validation groups.                | Symptom-warning model derived from logistic regression using 17 symptom features for early detection and 12 symptoms for late detection                                                                                                                                                                                                | No       | Early detection:<br>(internal validation)<br>AUC=0.89 (0.84-0.94)<br>Sensitivity=0.77<br>Specificity=0.88<br>Accuracy=0.83<br>Brier score=0.14<br><br>Late detection:<br>(internal validation)<br>AUC=0.93 (0.88-0.97)<br>Sensitivity=0.90<br>Specificity=0.85<br>Accuracy=0.86<br>Brier score=0.10 |

| Source                      | Definition of Lymphedema                                                                                                                   | Cohort                                                                                                                                                                              | Predictive Model                                                                                                                                                                                                                                                                                                                                                                  | Nomogram | Accuracy/Validation                                                                                                                                        |
|-----------------------------|--------------------------------------------------------------------------------------------------------------------------------------------|-------------------------------------------------------------------------------------------------------------------------------------------------------------------------------------|-----------------------------------------------------------------------------------------------------------------------------------------------------------------------------------------------------------------------------------------------------------------------------------------------------------------------------------------------------------------------------------|----------|------------------------------------------------------------------------------------------------------------------------------------------------------------|
| Yuan et al. 2021            | Volumetric arm measurements (water displacement); >10% difference defined as lymphedema                                                    | 320 women with node-positive breast cancer who underwent BCS or mastectomy, and ALND; 60 (18.7%) with BCRL at median 29 months (range 20-34). Excluded if neoadjuvant chemotherapy. | Arm Lymphatics Distribution (ALD) model for intraoperative risk prediction of lymphedema development based on odds ratios (logistic regression). Factors in model: <ul style="list-style-type: none"> <li>• BMI</li> <li>• Taxane-based chemotherapy</li> <li>• Radiotherapy</li> <li>• Proportion of arm lymph flow above the level of the axillary vein (protective)</li> </ul> | Yes      | Internal:<br>AUC=0.83<br>Hosmer-Lemeshow test p=0.721<br>Calibration plot<br><br>External:<br>AUC=0.80<br>Hosmer-Lemeshow test p=0.804<br>Calibration plot |
| Martinez-Jaimez et al. 2022 | Recorded diagnosis of lymphedema, and medical/physiotherapist report indicating ≥ 2cm difference in arm circumference                      | 504 women who underwent breast cancer surgery (BCS or mastectomy) including ALND. 156 (31%) developed lymphedema within 2 years.                                                    | Logistic regression to model and identify significant risk factors: <ul style="list-style-type: none"> <li>• Level of ALND</li> <li>• Lymph node status</li> <li>• Postoperative complications</li> <li>• BMI</li> <li>• Number of nodes extracted</li> </ul>                                                                                                                     | No       | AUC=0.68                                                                                                                                                   |
| Konishi et al. 2022         | Diagnosis of lymphedema based on record of treatment associated with postoperative lymphedema, as documented in nationwide claims database | 84,022 women who underwent breast cancer surgery; 1,547 (1.8%) received treatment for lymphedema during median follow up of 119 weeks (IQR 59-187). SLNB in 63.4%, ALND in 24.7%.   | Identified prognostic factors based on multivariable survival analysis <ul style="list-style-type: none"> <li>• Baseline factors: young age, BMI, smoking history, collagen diseases, advanced cancer stage, total mastectomy, ALND</li> <li>• Postoperative factors: bleeding, chemotherapy, radiotherapy</li> </ul>                                                             | No       | N/A                                                                                                                                                        |

ALND, axillary lymph node dissection. AUC, area under curve. BCS, breast-conserving surgery. IQR, interquartile range. N/A, not available. NCI, National Cancer Institute. RNI, regional nodal irradiation. SLNB, sentinel lymph node biopsy. WBI, whole breast irradiation.
