# Supplementary material
Source: PubMed Central journal article supplement (PMC10339225)
Supplement: jamasurg-e232414-s002.pdf [file jamasurg-e232414-s002.pdf]

## Data Sharing Statement

Rochlin. Feasibility and Clinical Utility of Prediction Models for Breast Cancer–Related Lymphedema Incorporating Racial Differences in Disease Incidence. *JAMA Surg*. Published July 12, 2023. doi:10.1001/jamasurg.2023.2414

### Data

**Data available:** Yes

**Data types:** Deidentified participant data

**How to access data:** Please email [mehrarab@mskcc.org](mailto:mehrarab@mskcc.org) for data requests.

**When available:** With publication

### Supporting Documents

**Document types:** None

### Additional Information

**Who can access the data:** Researchers whose proposed use of the data has been approved

**Types of analyses:** For any purpose

**Mechanisms of data availability:** After approval of a proposal
